# Supplementary material for: The Inhibitory Properties of a Novel, Selective LMTK3 Kinase Inhibitor
Source: MDPI journal article supplement (doi:10.3390/ijms24010865), 2023-01-03
Supplement: s1 [file s1]

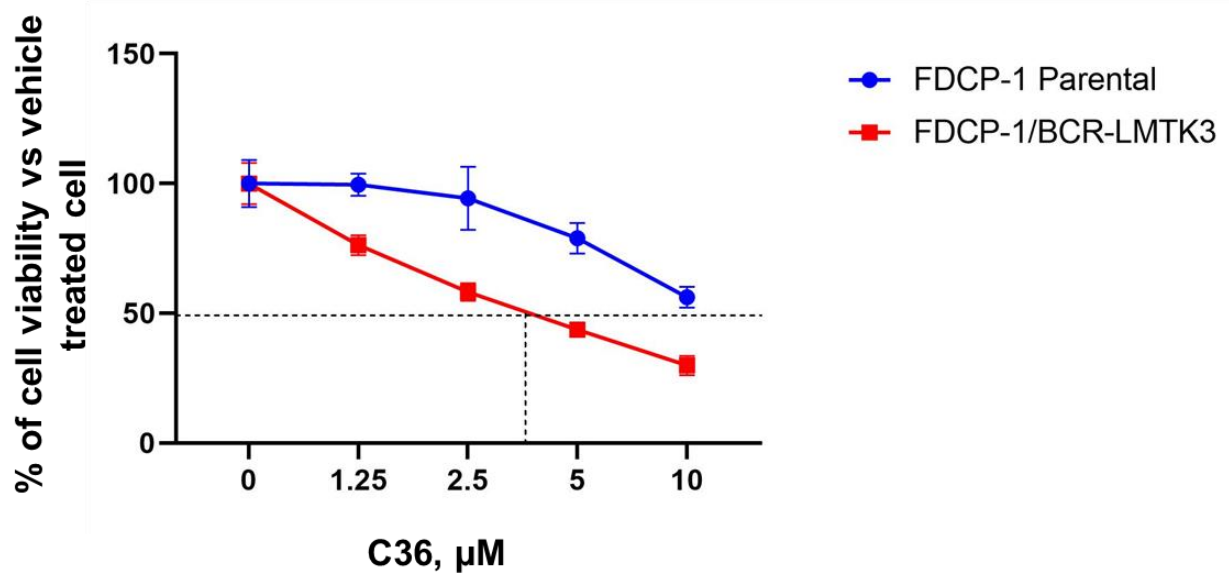

Figure S1: IC<sub>50</sub> values for C36 in FDCP1 and FDCP1-LMTK3 cell lines. Error bars represent the means  $\pm$  SD from three independent experiments.

## Binding check analysis between 4% DMSO and LMTK3 kinase domain

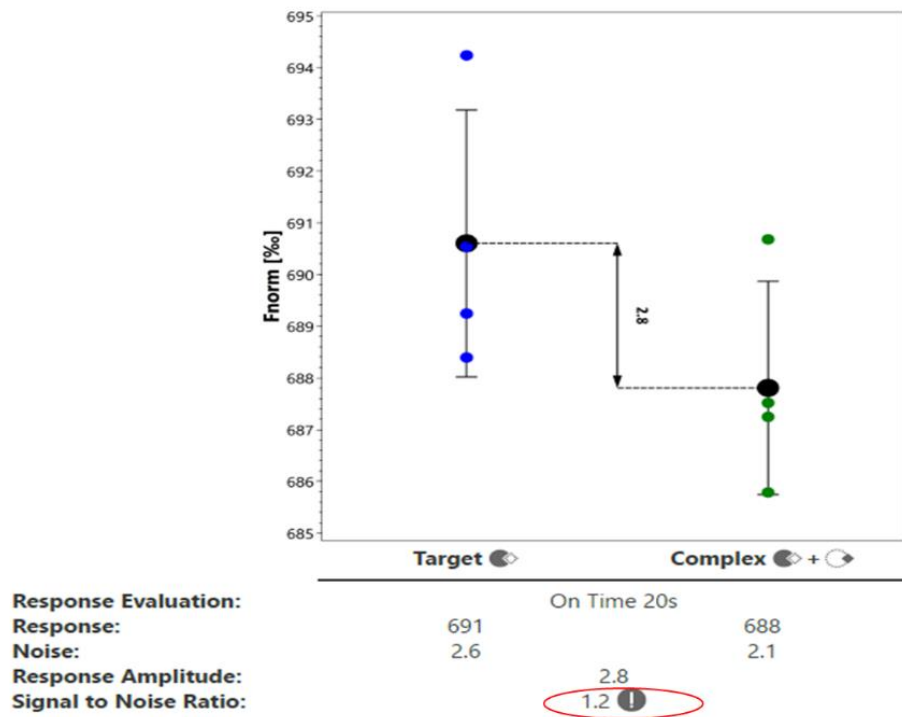

Figure S2: Binding check analysis between DMSO and LMTK3 kinase domain. The signal to noise ratio is used to evaluate the quality of the binding data. It is defined as the response amplitude divided by the noise of the measurement. A signal to noise ratio of more than 5 is desirable, while more than 12 reflects an excellent binding assay (NT Analysis software (NanoTemper Technologies)).



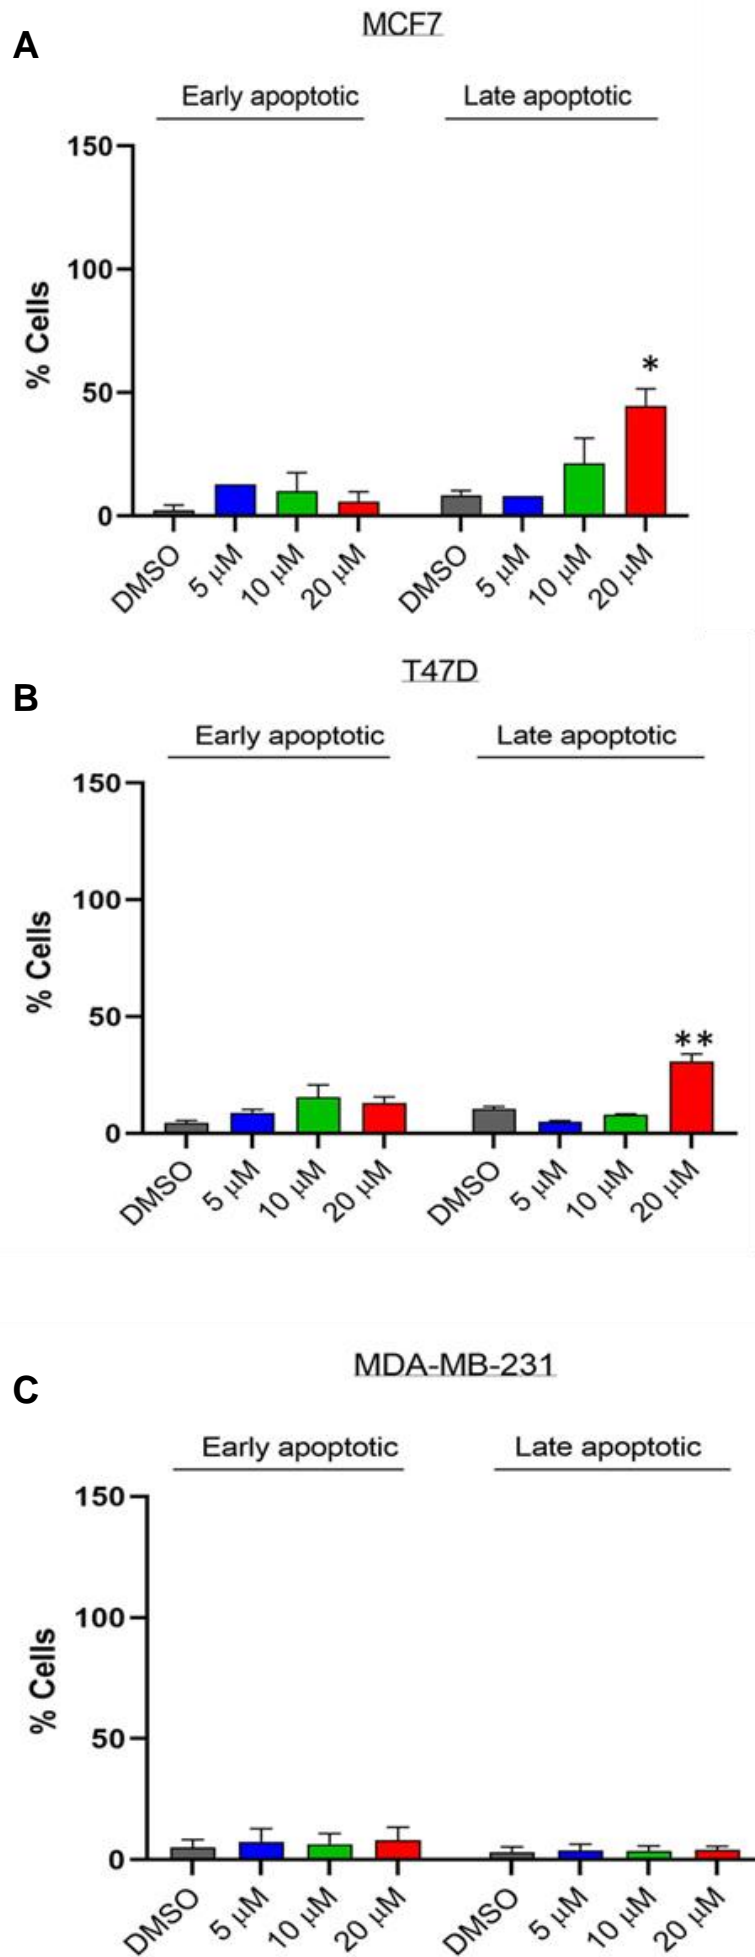

Figure S4: Apoptotic effect of C36 on different human breast cancer cell lines. MCF7 (A), T47D (B) and MDA-MB-231 (C) were treated with increasing concentrations of C36 for 96 h. The percentages of early apoptotic and late apoptotic cells were analyzed by Annexin V and 7-AAD staining. Results are expressed as means  $\pm$  SEM; \*  $p < 0.05$ , \*\*  $p < 0.01$ .

**A**

| Metabolic Stability |                                                               | Caco-2 Permeability Assay                          |              |
|---------------------|---------------------------------------------------------------|----------------------------------------------------|--------------|
| Half-life (minutes) | Intrinsic clearance<br>( $\mu\text{L}/\text{min}/\text{mg}$ ) | Passive permeability<br>( $\text{cm}/\text{sec}$ ) | Efflux ratio |
| 22                  | 132                                                           | $5.1 \times 10^{-6}$                               | 2.1          |

**B**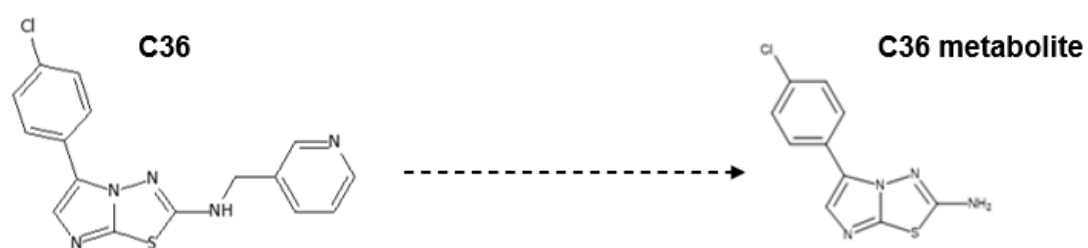

Figure S5: Pharmacological properties of C36.

Number of distinct conformational clusters found = 12, out of 100 runs,  
Using an **rmsd-tolerance of 2.0 Å**

#### CLUSTERING HISTOGRAM

| Cluster Rank | Lowest Binding Energy | Run | Mean Binding Energy | Num in Cluster | Histogram                          |
|--------------|-----------------------|-----|---------------------|----------------|------------------------------------|
|              |                       |     |                     |                | 5 10 15 20 25 30 35<br>: : : : : : |
| 1            | -9.04                 | 82  | -8.76               | 51             | #####                              |
| 2            | -8.91                 | 12  | -8.77               | 13             | #####                              |
| 3            | -8.16                 | 18  | -8.11               | 6              | #####                              |
| 4            | -8.11                 | 84  | -8.09               | 8              | #####                              |
| 5            | -8.06                 | 94  | -7.97               | 4              | ####                               |
| 6            | -8.04                 | 41  | -8.04               | 1              | #                                  |
| 7            | -7.87                 | 30  | -7.79               | 8              | #####                              |
| 8            | -7.68                 | 28  | -7.68               | 1              | #                                  |
| 9            | -7.63                 | 90  | -7.62               | 5              | #####                              |
| 10           | -7.50                 | 7   | -7.50               | 1              | #                                  |
| 11           | -7.46                 | 79  | -7.46               | 1              | #                                  |
| 12           | -7.46                 | 83  | -7.46               | 1              | #                                  |

Number of multi-member conformational clusters found = 7, out of 100 runs.

```

MODEL      82
USER      Run = 82
USER      Cluster Rank = 1
USER      Number of conformations in this cluster = 51
USER
USER      RMSD from reference structure      = 72.756 Å
USER
USER      Estimated Free Energy of Binding    = -9.04 kcal/mol [(1)+(2)+(3)-(4)]
USER      Estimated Inhibition Constant, Ki   = 236.15 nM (nanomolar) [Temperature = 298.15 K]
USER
USER      (1) Final Intermolecular Energy     = -9.94 kcal/mol
USER      vdW + Hbond + desolv Energy         = -9.64 kcal/mol
USER      Electrostatic Energy                = -0.29 kcal/mol
USER      (2) Final Total Internal Energy     = -0.11 kcal/mol
USER      (3) Torsional Free Energy           = +0.89 kcal/mol
USER      (4) Unbound System's Energy [(2)]  = -0.11 kcal/mol
USER

```

Figure S6: Docking results of C36 to the model of active LMTK3.
